# Supplementary material for: Exploring the rate dependence of phase evolution in P2-type Na2/3Mn0.8Fe0.1Ti0.1O2
Source: Royal Society of Chemistry journal article supplement (doi:10.1039/c9ta01366k), 2019-01-01
Supplement: c9ta01366k1.pdf [file c9ta01366k1.pdf]

## Supporting Information

# Exploring the rate dependence of phase evolution in P2-type $\text{Na}_{2/3}\text{Mn}_{0.8}\text{Fe}_{0.1}\text{Ti}_{0.1}\text{O}_2$

Damian Goonetilleke<sup>1,\*</sup>, Sunny Wang<sup>1</sup>, Elena Gonzalo<sup>2</sup>, Montserrat Galcerán<sup>2</sup>, Damien Saurel<sup>2</sup>, Sarah J. Day<sup>3</sup>, Francois Fauth<sup>4</sup>, Teófilo Rojo<sup>2,5</sup>, Neeraj Sharma<sup>1</sup>

<sup>1</sup> *School of Chemistry, UNSW Sydney, Sydney NSW 2052, Australia*

<sup>2</sup> *CICenergigune, Parque Tecnológico de Álava, Albert Einstein 48, ED.CIC, 01510, Miñano, Spain*

<sup>3</sup> *Light Source, Harwell Science and Innovation Campus, Didcot OX11 0DE, UK*

<sup>4</sup> *CELLS - ALBA synchrotron, E-08290 Cerdanyola del Vallès, Barcelona, Spain*

<sup>5</sup> *Departamento de Química Inorgánica, Universidad del País Vasco UPV/EHU, P.O. Box. 644, 48080, Bilbao, Spain*

## Supporting Information

Table S1 Capacities observed during variable current cycling.

| Cycle |           | Current (mA) | Current Density (mA/g) | Capacity (mAh/g) |
|-------|-----------|--------------|------------------------|------------------|
| 1     | Charge    | 1.04         |                        |                  |
| 2     | Discharge | -1.74        | -43.98382204           | 131.706          |
| 3     | Charge    | 1.73         | 43.73104146            | 141.475          |
| 4     | Discharge | -3.48        | -87.96764408           | 117.746          |
| 5     | Charge    | 3.47         | 87.7148635             | 120.954          |
| 6     | Discharge | -5.21        | -131.6986855           | 103.347          |
| 7     | Charge    | 5.21         | 131.6986855            | 105.877          |
| 8     | Discharge | -10.43       | -263.6501517           | 74.1174          |
| 9     | Charge    | 10.42        | 263.3973711            | 75.2338          |
| 10    | Discharge | -10.43       | -263.6501517           | 70.7246          |
| 11    | Charge    | 10.42        | 263.3973711            | 72.8603          |
| 12    | Discharge | -10.43       | -263.6501517           | 67.7002          |
| 13    | Charge    | -10.42       | -263.3973711           | 69.7946          |
| 14    | Discharge | -10.43       | -263.6501517           | 64.8919          |
| 15    | Charge    | 10.42        | 263.3973711            | 66.7788          |
| 16    | Discharge | -10.43       | -263.6501517           | 62.1215          |
| 17    | Charge    | 10.42        | 263.3973711            | 63.9681          |
| 18    | Discharge | -10.43       | -263.6501517           | 59.7784          |
| 19    | Charge    | 10.42        | 263.3973711            | 61.1526          |
| 20    | Discharge | -10.43       | -263.6501517           | 57.3115          |
| 21    | Charge    | 20.84        | 526.7947422            | 53.9618          |
| 22    | Discharge | -20.84       | -526.7947422           | 30.5967          |
| 23    | Charge    | 1.73         | 43.73104146            | 55.236           |
| 24    | Rest      | 0            | 0                      |                  |

XRD

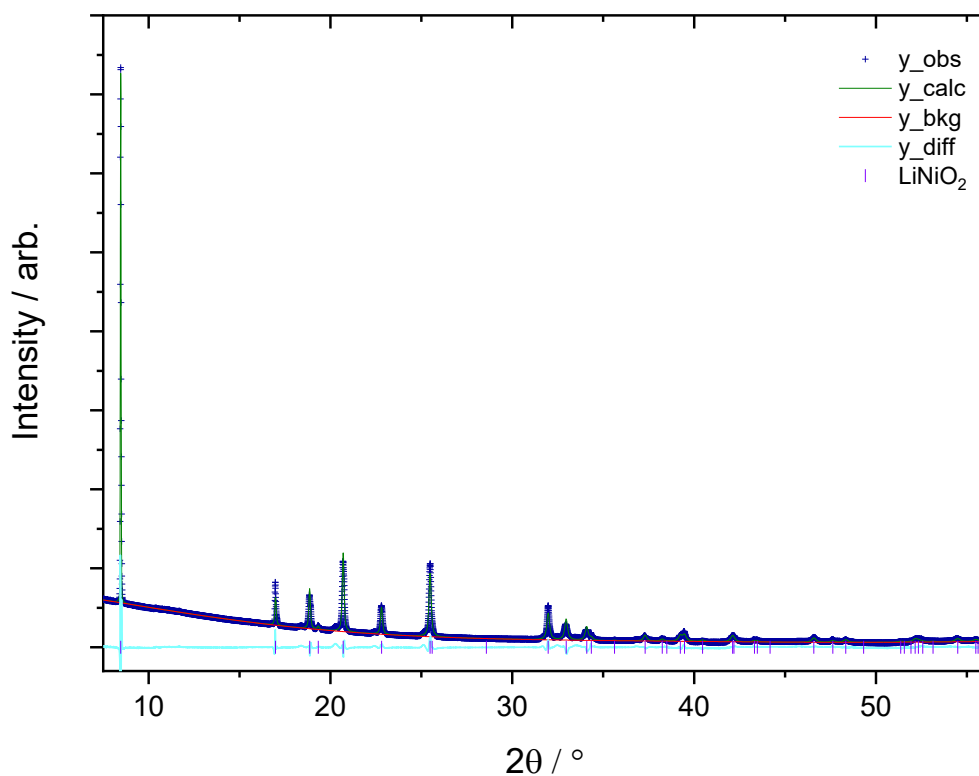

Figure S1. Rietveld refinement profile of XRD data collected on the MSPD beamline at the ALBA synchrotron from a capillary of pristine P2-type  $\text{Na}_{2/3}\text{Mn}_{0.8}\text{Fe}_{0.1}\text{Ti}_{0.1}\text{O}_2$  powder prior to the *operando* experiment.

Table S2. Refined structural parameters determined from XRD data collected on the MSPD beamline at the ALBA synchrotron from a capillary of pristine P2-type  $\text{Na}_{2/3}\text{Mn}_{0.8}\text{Fe}_{0.1}\text{Ti}_{0.1}\text{O}_2$  powder prior to the *operando* experiment.

| Space group: $P 63/m m c$ , $R_w = 6.89\%$ |                   |               |         |             |           |                         |
|--------------------------------------------|-------------------|---------------|---------|-------------|-----------|-------------------------|
| a / Å                                      | b / Å             | c / Å         | alpha   | beta        | gamma     | Volume / Å <sup>3</sup> |
| 2.910991(98)                               | 2.910991(98)      | 11.18831(476) | 90      | 90          | 120       | 82.106(5)               |
| Atom                                       | Site multiplicity | x             | y       | z           | SOF       | U <sub>iso</sub>        |
| Mn                                         | 2                 | 0             | 0       | 0           | 0.8       | 0.0090(5)               |
| Na2                                        | 2                 | 0             | 0       | 0.25        | 0.282(12) | 0.098(11)               |
| O                                          | 4                 | 0.33333       | 0.66667 | 0.09052(31) | 1         | 0.0033(10)              |
| Fe                                         | 2                 | 0             | 0       | 0           | 0.1       | 0.0090(5)               |
| Na1                                        | 2                 | 0.33333       | 0.66667 | 0.75        | 0.348(10) | 0.022(5)                |
| Ti                                         | 2                 | 0             | 0       | 0           | 0.1       | 0.0090(5)               |

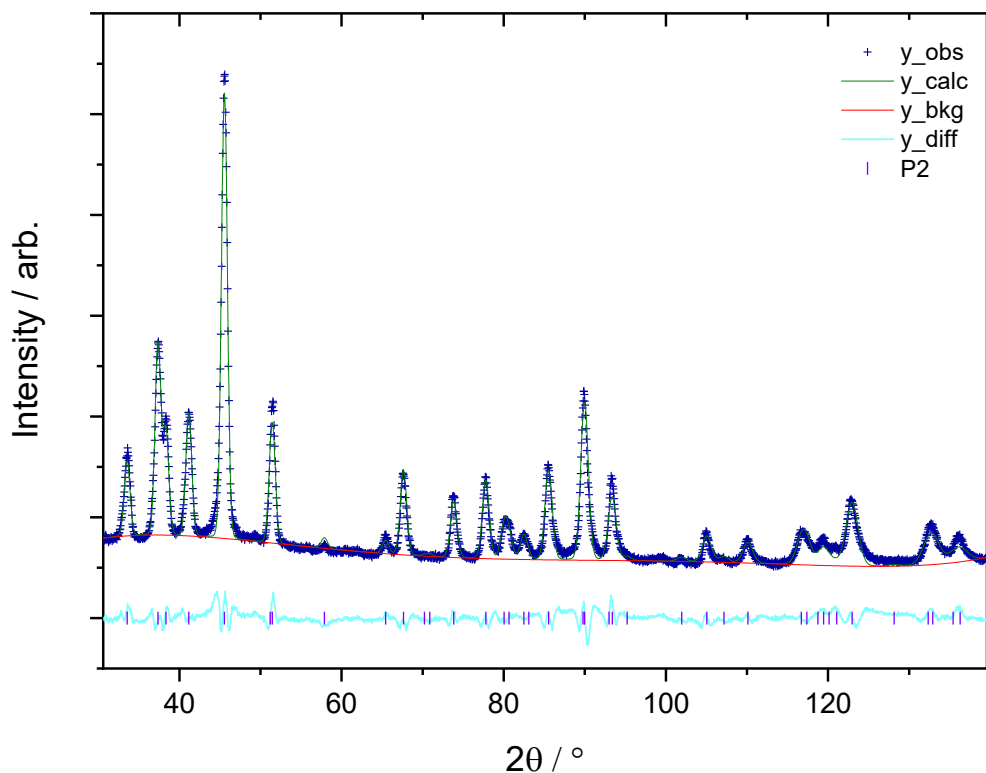

Figure S2. Rietveld refinement profile of NPD data collected using ECHIDNA at ANSTO from pristine P2-type  $\text{Na}_{2/3}\text{Mn}_{0.8}\text{Fe}_{0.1}\text{Ti}_{0.1}\text{O}_2$  powder prior to the *operando* experiment.

Table S3. Refined structural parameters determined from NPD data collected ECHIDNA at ANSTO from pristine P2-type  $\text{Na}_{2/3}\text{Mn}_{0.8}\text{Fe}_{0.1}\text{Ti}_{0.1}\text{O}_2$  powder prior to the *operando* experiment.

| Space group: P 63/m m c, $R_w = 5.96\%$ |          |               |          |             |            |                         |
|-----------------------------------------|----------|---------------|----------|-------------|------------|-------------------------|
| a / Å                                   | b / Å    | c / Å         | alpha    | beta        | gamma      | Volume / Å <sup>3</sup> |
| 2.912053(62)                            | 2.912053 | 11.18414(141) | 90       | 90          | 120        | 82.136(26)              |
| Atom                                    | mult     | x             | y        | z           | frac       | $U_{iso}$               |
| Mn                                      | 2        | 0             | 0        | 0           | 0.73(7)    | 0.0226(18)              |
| Na2                                     | 2        | 0             | 0        | 0.25        | 0.238(15)  | 0.054(8)                |
| O                                       | 4        | 0.333333      | 0.666667 | 0.09031(18) | 1          | 0.0223(4)               |
| Fe                                      | 2        | 0             | 0        | 0           | 0.0902(20) | 0.0226(18)              |
| Na1                                     | 2        | 0.333333      | 0.666667 | 0.75        | 0.421(19)  | 0.090(8)                |
| Ti                                      | 2        | 0             | 0        | 0           | 0.18(7)    | 0.0226(18)              |
